# Supplementary material for: Visible-light-induced degradation of polybrominated diphenyl ethers with AgI–TiO2
Source: Royal Society of Chemistry journal article supplement (doi:10.1039/c7ra07106j), 2017-01-01
Supplement: c7ra07106j1.pdf [file c7ra07106j1.pdf]

## **Visible-light-induced degradation of polybrominated diphenyl ethers with AgI-TiO<sub>2</sub>**

Ying-Ying Shao<sup>a</sup>, Wei-Dong Ye<sup>a</sup>, Chun-Yan Sun<sup>a\*</sup>, Chu-Lin Liu<sup>a</sup>, Qi Wang<sup>b</sup>

*<sup>a</sup>Department of Chemistry, Shaoxing University, Zhejiang Shaoxing 312000, China*

*<sup>b</sup>School of Environment Sciences and Engineering, Zhejiang Gongshang University, Hangzhou, China*

---

\*Corresponding author: E-mail: [sunchunyan@usx.edu.cn](mailto:sunchunyan@usx.edu.cn); Tel/Fax: 86-0575-8834-1521,

## Supplementary materials

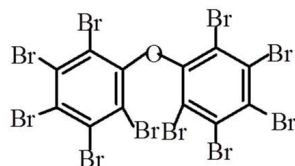

Fig. S1. The structure of BDE209

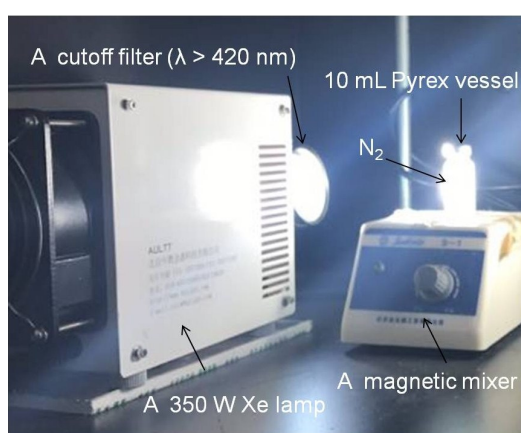

Fig. S2. The photo of the reaction devices.

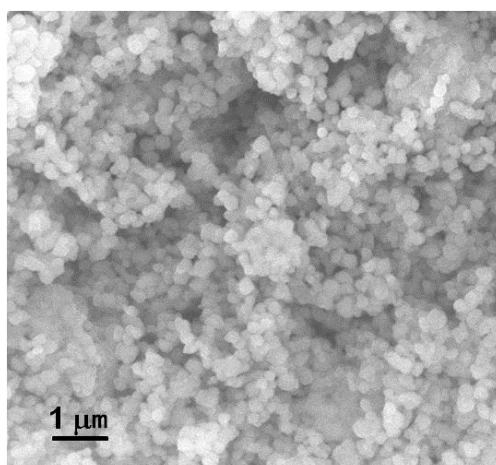

Fig. S3. SEM image of 0.2-AgI-TiO<sub>2</sub>

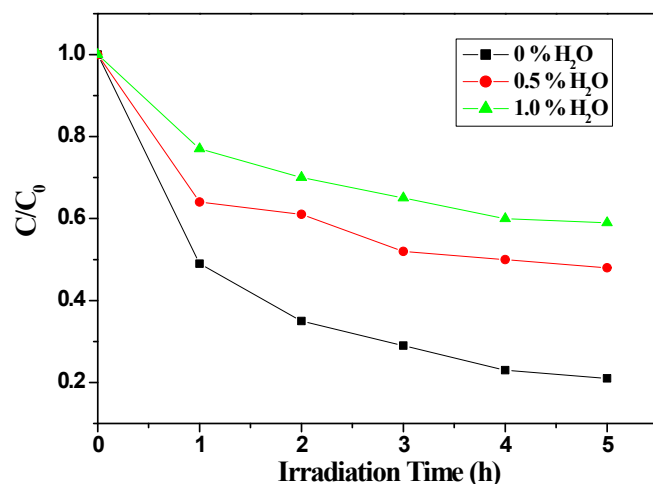

Fig. S4. Temporal curves of the photodegradation of BDE209 under different ratio H<sub>2</sub>O under visible irradiation. BDE209:  $1.0 \times 10^{-5}$  mol/L, AgI-TiO<sub>2</sub>: 1mg/mL, solvent: H<sub>2</sub>O/CH<sub>3</sub>OH (V/V: 0%, 0.5%, 1.0%), wavelength > 420 nm, anoxic condition.

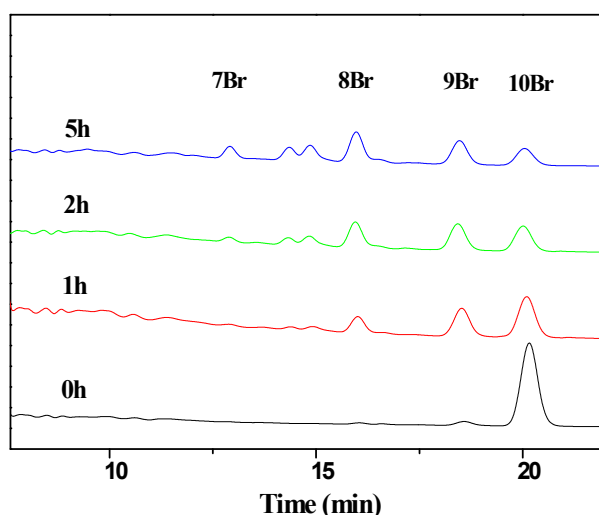

Fig. S5 HPLC chromatograms of degradation products of BDE209 with AgI-TiO<sub>2</sub> in different irradiation times. BDE209:  $1.0 \times 10^{-5}$  mol/L, solvent: CH<sub>3</sub>OH, wavelength > 420 nm; 0.2-AgI-TiO<sub>2</sub>, 1.0 mg/mL; anoxic condition.

Table S1 Adsorption amount and photocatalytic degradation rates of BDE209 with 0.2-AgI-TiO<sub>2</sub> under various solvent conditions <sup>a</sup>

|   | solvents | Adsorption amount (%) | Degradation rate (%) <sup>a</sup> |
|---|----------|-----------------------|-----------------------------------|
| 1 | toluene  | 0                     | 0                                 |
| 2 | acetone  | 0                     | 0                                 |
| 3 | hexane   | 0                     | 0                                 |

|   |              |      |      |
|---|--------------|------|------|
| 4 | THF          | 0.2  | 0    |
| 5 | DMSO         | 0.6  | 0    |
| 6 | DMF          | 4.1  | 56.6 |
| 7 | acetonitrile | 20.4 | 33.6 |
| 8 | methanol     | 30.1 | 71.1 |

BDE209,  $1.0 \times 10^{-5}$  mol/L; 0.2-AgI-TiO<sub>2</sub>, 1.0 mg/mL; wavelength > 420 nm; anoxic condition. <sup>a</sup> Removed ratios after 3 h of irradiation.

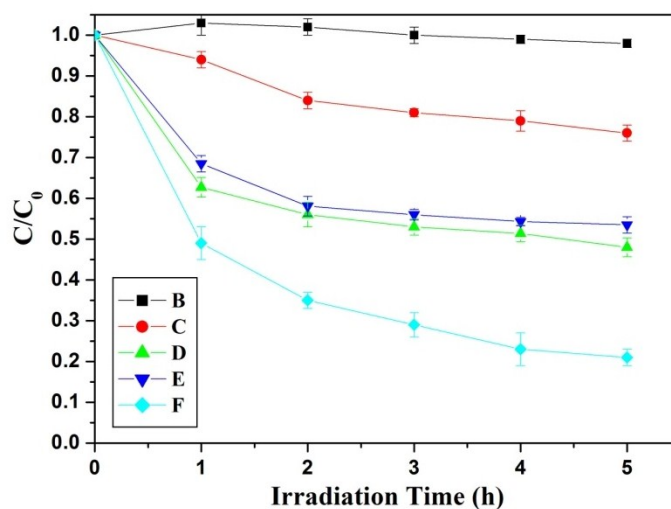

Fig. S6 degradation products of BDE209 in different conditions. BDE209,  $1.0 \times 10^{-5}$  mol/L; solvent, CH<sub>3</sub>OH; wavelength, > 420 nm; catalyst, 1.0 mg/mL; B) 0.2-AgI-TiO<sub>2</sub>/O<sub>2</sub>; C) 0.2-AgI-TiO<sub>2</sub>/air; D) 0.2-AgI-Al<sub>2</sub>O<sub>3</sub>/N<sub>2</sub>; E) 0.2-AgI-SiO<sub>2</sub>/N<sub>2</sub>; F) 0.2-AgI-TiO<sub>2</sub>/N<sub>2</sub>
